# Supplementary material for: Dynamically crosslinked materials via recognition of amino acids by cucurbit[8]uril
Source: Royal Society of Chemistry journal article supplement (doi:10.1039/c3tb20180e), 2013-01-01
Supplement: c3tb20180e.pdf [file c3tb20180e.pdf]

# Dynamically Crosslinked Materials *via* Charge-mediated Recognition of Amino Acids by Cucurbit[8]uril

Matthew J. Rowland<sup>†</sup>, Eric A. Appel<sup>†</sup>, Roger J. Coulston, and  
Oren A. Scherman\*

Melville Laboratory for Polymer Synthesis, Department of Chemistry, University of Cambridge,  
Lensfield Road, Cambridge CB2 1EW, United Kingdom. Email: oas23@cam.ac.uk

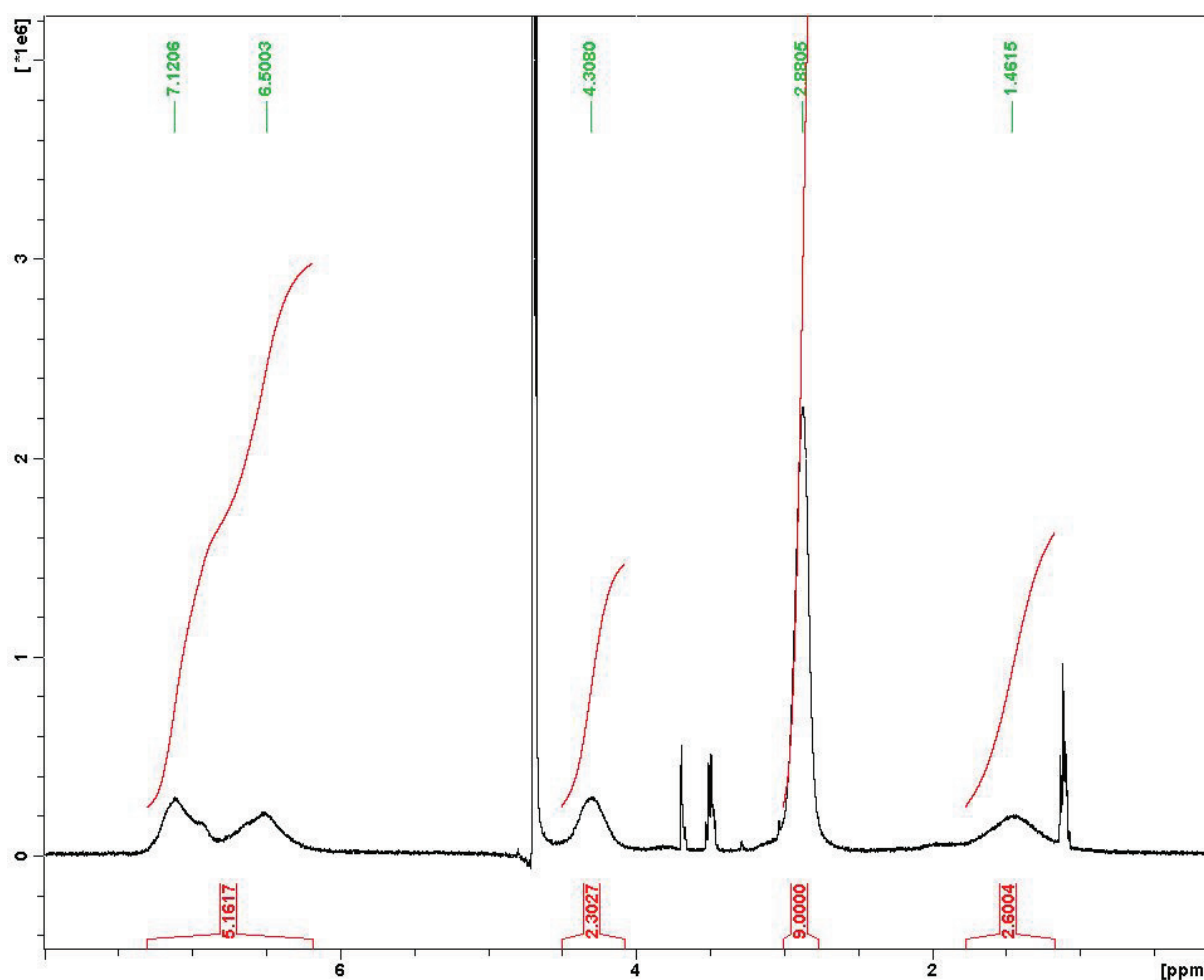

Figure S1: <sup>1</sup>H NMR of StPhe-StAm polymer.

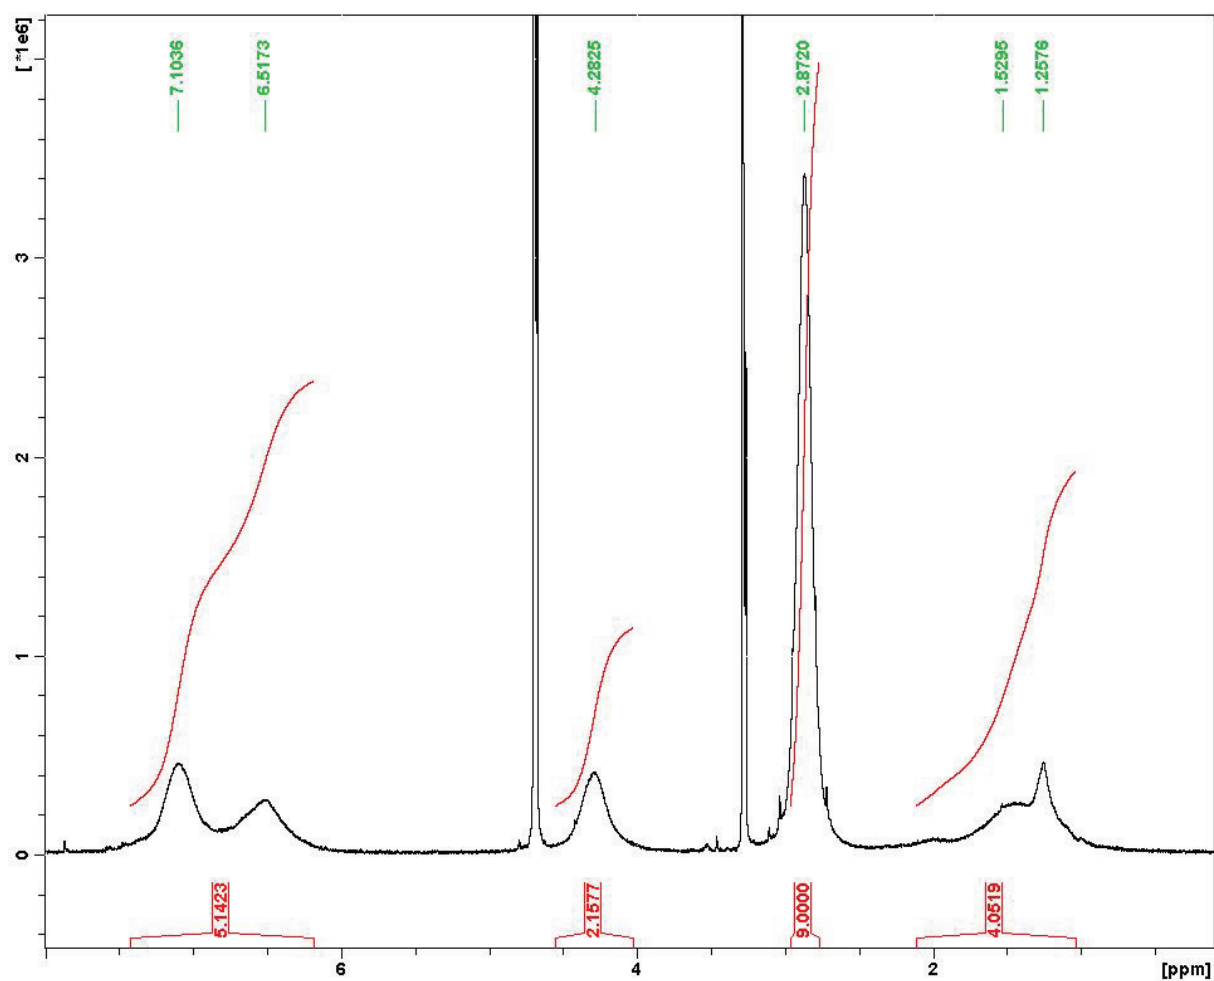

**Figure S2:**  $^1\text{H}$  NMR of StTrp-StAm polymer.

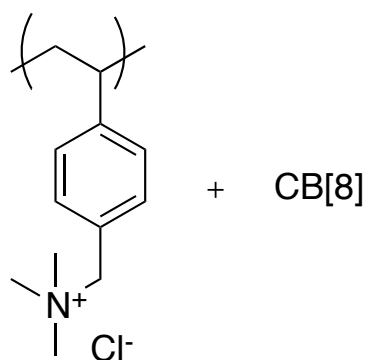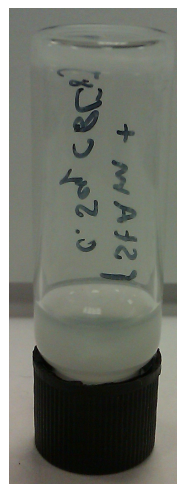

**Figure S3:** p-StAm + 0.5 eq. CB[8]. No change in viscosity observed on account of no available amino acids forming dynamic crosslinks.

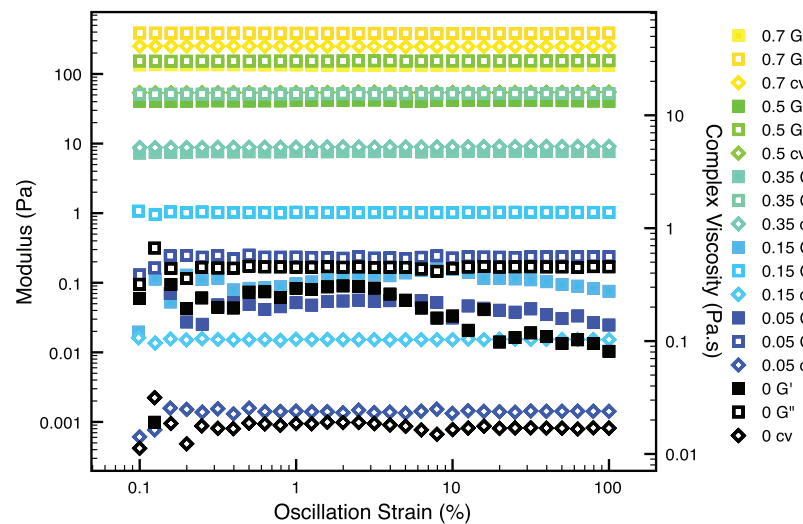

Figure S4: Strain-dependant oscillatory shear measurements, StPhe-StAm.

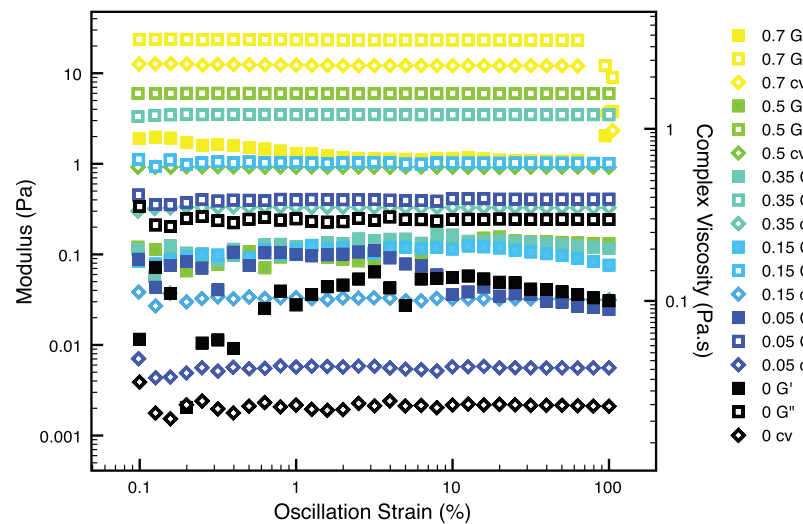

Figure S5: Strain-dependant oscillatory shear measurements, StTrp-StAm.
